# Supplementary material for: Scaling-up social needs screening in practice: a retrospective, cross-sectional analysis of data from electronic health records from Bronx county, New York, USA
Source: HighWire-hosted journal article supplement (doi:10.1136/bmjopen-2021-053633), 2021-09-01
Supplement: bmjopen-2021-053633supp001_data_supplement.pdf [file bmjopen-2021-053633supp001_data_supplement.pdf]

## Supplemental File 1. Social Needs Screening Tool

**ENGLISH**

PLEASE PLACE PATIENT LABEL HERE

Your care team is interested in your complete wellness. Please take a moment to answer the questions below prior to seeing your doctor. **This is an optional questionnaire.**

|                                                                                     |                                                                                                                                                | YES / NO                                              |
|-------------------------------------------------------------------------------------|------------------------------------------------------------------------------------------------------------------------------------------------|-------------------------------------------------------|
|    | Are you worried that in the next 2 months, you may not have a safe or stable place to live? (risk of eviction, being kicked out, homelessness) | <input type="checkbox"/> Y <input type="checkbox"/> N |
|    | Are you worried that the place you are living now is making you sick? (has mold, bugs/rodents, water leaks, not enough heat)                   | <input type="checkbox"/> Y <input type="checkbox"/> N |
|  | In the past 12 months, has the electric, gas, oil or water company threatened to shut off services to your home?                               | <input type="checkbox"/> Y <input type="checkbox"/> N |
|  | In the last 12 months, did you worry that your food could run out before you got money to buy more?                                            | <input type="checkbox"/> Y <input type="checkbox"/> N |
|  | In the last 12 months, has lack of transportation kept you from medical appointments or getting your medications?                              | <input type="checkbox"/> Y <input type="checkbox"/> N |
|  | In the last 12 months, did you have to skip buying medications or going to doctor's appointments to save money?                                | <input type="checkbox"/> Y <input type="checkbox"/> N |
|  | Do you need help getting child care or care for an elderly or sick adult?                                                                      | <input type="checkbox"/> Y <input type="checkbox"/> N |
|  | Do you need legal help? (child/family services, immigration, housing discrimination, domestic issues, etc)                                     | <input type="checkbox"/> Y <input type="checkbox"/> N |
|  | Are you finding it hard to get along with a partner, spouse, or family members?                                                                | <input type="checkbox"/> Y <input type="checkbox"/> N |
|  | Does anyone in your life hurt you, threaten you, frighten you or make you feel unsafe?                                                         | <input type="checkbox"/> Y <input type="checkbox"/> N |

Phone Number: \_\_\_\_\_

Best time to Call: \_\_\_\_\_

Montefiore Social Determinants of Health Screen  
As of: March 9, 2018

Disclaimer: This screening tool is a derivative of a Recommended Screening Tool by Health Leads (<https://healthleadsusa.org/>) licensed under a Creative Commons Attribution-ShareAlike 4.0 International License (<https://creativecommons.org/licenses/by-sa/4.0/>) and was adapted by Montefiore Health System's Office of Community and Population Health

**Montefiore**  
**DOING MORE**<sup>SM</sup>
